# Supplementary material for: Rational design of signal-on biosensors by using photoinduced electron transfer between Ag nanoclusters and split G-quadruplex halves–hemin complexes
Source: Royal Society of Chemistry journal article supplement (doi:10.1039/c4cc06664b), 2014-01-01
Supplement: c4cc06664b1.pdf [file c4cc06664b1.pdf]

Supporting information for

**Rational design of signal-on biosensors by using  
Photoinduced Electron Transfer between Ag  
Nanoclusters and split G-quadruplex halves/Hemin  
Complex**

Kai Zhang,\* Ke Wang, Xue Zhu, Yun Gao, and Minhao Xie\*

Key Laboratory of Nuclear Medicine, Ministry of Health, Jiangsu Key Laboratory of  
Molecular Nuclear Medicine, Jiangsu Institute of Nuclear Medicine. Wuxi, Jiangsu  
214063, China.

\* To whom correspondence should be addressed. E-mail:zhangkai@jsinm.org (K.  
Zhang), [xieminhao@jsinm.org](mailto:xieminhao@jsinm.org) (M. Xie).

## Experimental section

**Materials.** All oligonucleotides were purchased from Genscript Biotechnology Co., Ltd (Nanjing, China) and their sequences were listed in Table S1. The stock solutions of DNA were prepared in 20 mM phosphate buffer. Silver nitrate ( $\text{AgNO}_3$ ), sodium borohydride ( $\text{NaBH}_4$ ), adenosine and hemin were purchased from Sigma-Aldrich (St. Louis, MO, USA). The stock solution of hemin (5  $\mu\text{M}$ ) was prepared in dimethyl sulfoxide (DMSO), stored in darkness at  $-20\text{ }^\circ\text{C}$ . Other chemicals were of reagent grade and were used without further purification. Solutions were prepared with ultrapure water, which was purified with Milli-Q purification system (Branstead) to a specific resistivity of  $> 18.2\text{ M}\Omega\text{ cm}$ .

**Fluorescent Adenosine Assays:** In adenosine assay, DNA1 and DNA3 (1.0  $\mu\text{M}$  each) in 20 mM phosphate buffer (5.0 mM  $\text{Mg}(\text{Ac})_2$ , pH 7.4) was heated at  $88\text{ }^\circ\text{C}$  for 10 min, and gradually cooled to room temperature. A 6  $\mu\text{M}$  solution of  $\text{AgNO}_3$  was added to the DNA solutions, After 1.0 h at room temperature, 6  $\mu\text{M}$   $\text{NaBH}_4$  was added into the mixture. After 14.0 h reaction in the dark, appropriate concentrations of adenosine, 1.0  $\mu\text{M}$  hemin and 50 mM  $\text{KNO}_3$  were added, and the mixture was incubated for another 2.0 h, and then the fluorescence intensity was measured. In the experiment of selectivity, Concentration of adenosine is 80  $\mu\text{M}$  and for the other small molecules are 10 mM (the guanosine concentration is 0.5 mM).

**Fluorescent RNA Assays:** In a typical RNA assay, DNA2 and DNA3 (1.0  $\mu\text{M}$  each) in 20 mM phosphate buffer (5.0 mM  $\text{Mg}(\text{Ac})_2$ , pH 7.4) was heated at 88  $^\circ\text{C}$  for 10 min, and gradually cooled to room temperature. A 6.0  $\mu\text{M}$  solution of  $\text{AgNO}_3$  was added to the DNA solutions, After 1.0 h at room temperature, 6.0  $\mu\text{M}$   $\text{NaBH}_4$  was added into the mixture. After 14.0 h reaction in the dark, appropriate concentrations of target RNA, 1.0  $\mu\text{M}$  hemin and 50 mM  $\text{KNO}_3$  were added, and the mixture was incubated for another 2.0 h, and then the fluorescence intensity was measured. In the experiment of selectivity, the concentrations of target RNA and others are 1.4  $\mu\text{M}$ .

**Instrumentation:** The fluorescence spectra were recorded by a SpectraMax M5 Multi-Mode Microplate Readers (Molecular Devices, USA), using a Costar 96 well microtiter plate (No. 3599, Corning, New York, USA). The DNA-AgNCs displayed fluorescence emission at 655 nm upon excitation at 585 nm.

DNA1: 5'-GGG TTG GGT CTT TCA GTC CGT CAA CCT GGG GGA GTA TTG  
CGG AGG AAG GTG GGT AGG G-3'

DNA2: 5'-GGG TTG GGT CTT TCA GTC CGT CAA ACT ATA CAA CCT ACT  
ACC TCA GGG TAG GG-3'

DNA3: 5'-TGA CGG ACT GAC CTC CTT CCT CCC TAC GTG CTA AGA-3'

DNA3-zero: 5'-TGA CGG ACT GAA AGA CCT CCT TCC TCC CTA CGT GCT-3'

DNA3-two: 5'-TGA CGG ACT GAA ACC TCC TTC CTC CCT ACG TGC TGA-3'

DNA3-six: 5'-TGA CGG ACT CCT CCT TCC TCC CTA CGT GCT GAA AGA-3'

DNA3-eight: 5'-TGA CGG ACC TCC TTC CTC CCT ACG TGC TCT GAA AGA-3'

Let-7a: 5'-UGA GGU AGU AGG UUG UAU AGU U-3'

Let-7b: 5'-UGA GGU AGU AGG UUG UGU GGU U-3'

Let-7c: 5'-UGA GGU AGU AGG UUG UAU GGU U-3'

**Fig. S1** Oligonucleotides sequence used in this strategy. The colors of the sequences

are the same as given in Scheme 1.

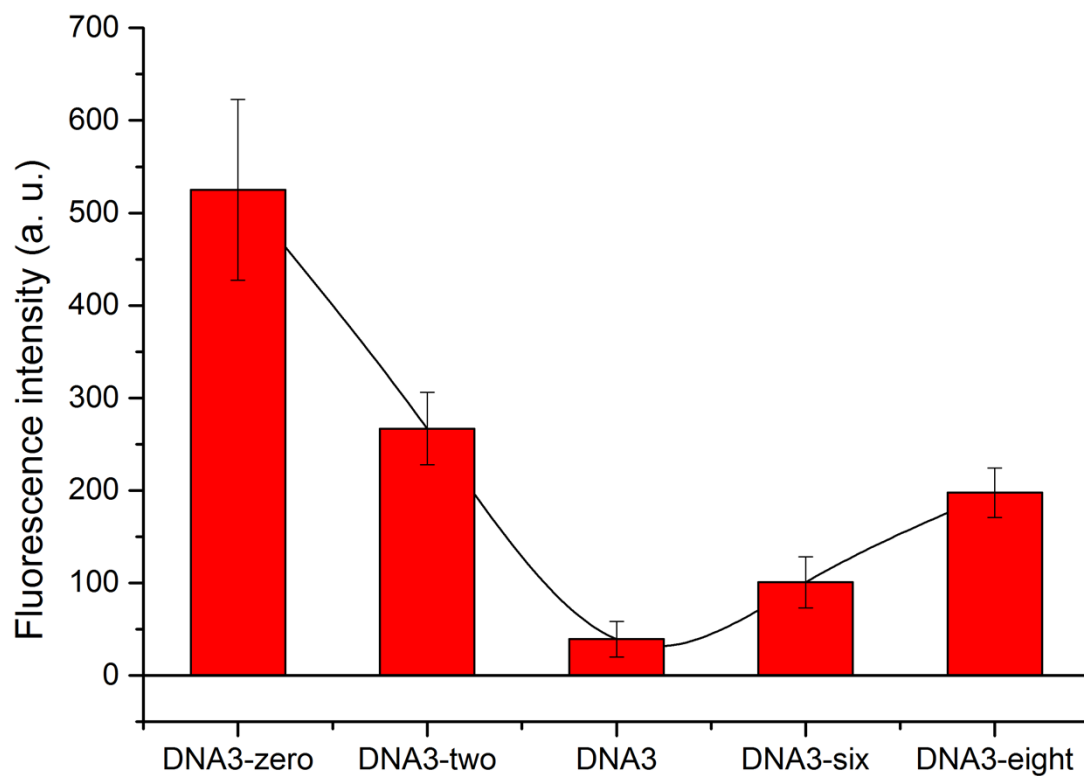

**Fig. S2** Quenching efficiency of the position of the DNA-templated loop from zero to eight bases away from the 3'-end of DNA3

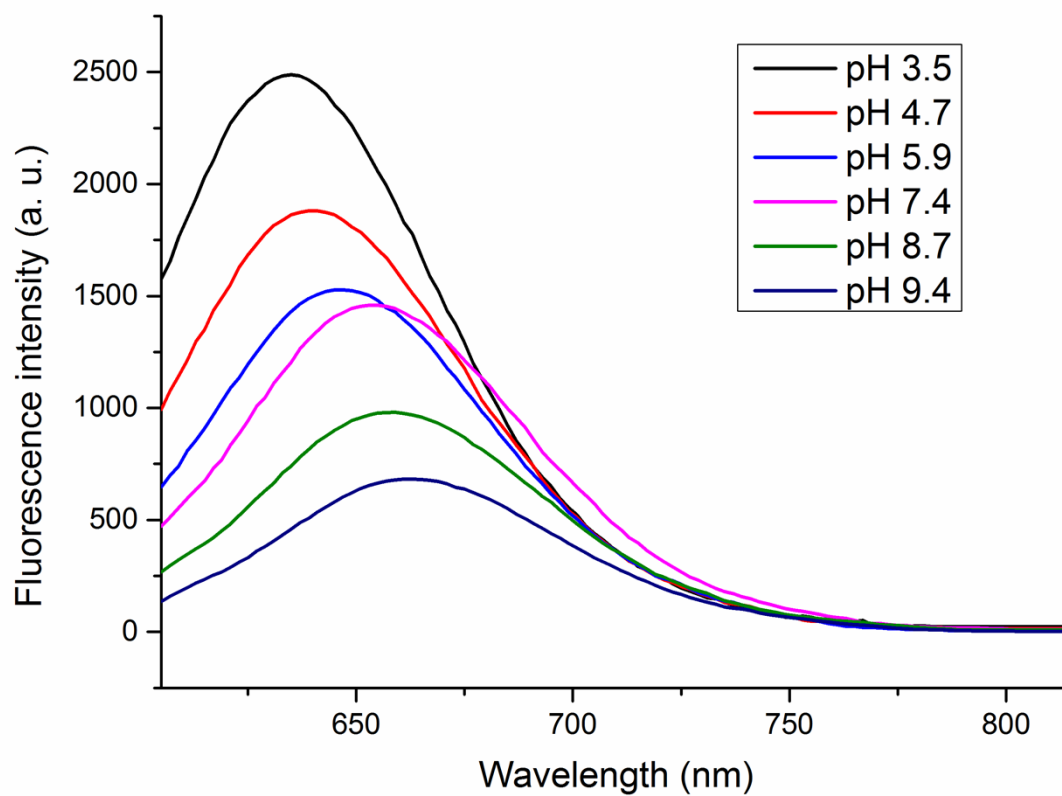

**Fig. S3** Fluorescence emission spectra of Ag nanoclusters generated under different pH conditions.

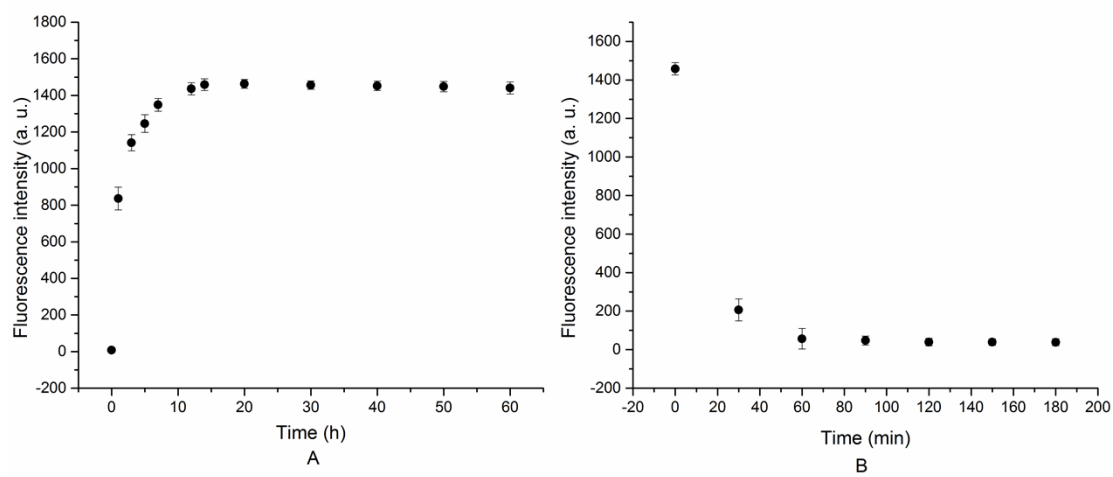

**Fig. S4** (A) Fluorescence peak intensity quantification for DNA1/DNA3/AgNO<sub>3</sub> for different time after adding NaBH<sub>4</sub>. (B) Fluorescence peak intensity quantification for DNA-AgNCs for different time after adding K<sup>+</sup> and hemin.
